# Supplementary material for: Circulating Levels of Resistin and Risk of Type 2 Diabetes in Men and Women: Results From Two Prospective Cohorts
Source: Oxford University Press journal article supplement (doi:10.2337/dc08-1625), 2008-10-29
Supplement: dc08-1625_online_appendix.doc [file dc08-1625_online_appendix.doc]

**Supplemental Table A1.** RR (95% CI) of type 2 diabetes and plasma resistin levels (per 1 log-SD increase) stratified by pre-specified diabetes risk factors.

| Subgroup Analyses | Full Model without BMI * | | Full Model with BMI * | |
| --- | --- | --- | --- | --- |
| RR (95% CI) | P-value for homogeneity † | RR (95% CI) | P-value for homogeneity † |
| Sex |  |  |  |  |
| Men | 1.23 (0.98, 1.53) | 0.49 | 1.18 (0.90, 1.56) | 0.50 |
| Women | 1.36 (1.15, 1.62) |  | 1.17 (0.98, 1.39) |  |
| Body Mass Index‡ |  |  |  |  |
| Normal/underweight | 1.34 (0.64, 2.80) |  | 1.33 (0.70, 2.52) |  |
| Overweight | 1.23 (0.99, 1.52) | 0.10 | 1.24 (0.99, 1.56) | 0.12 |
| Obese | 1.02 (0.82, 1.27) |  | 0.97 (0.76, 1.24) |  |
| Age (years)‡ |  |  |  |  |
| <60 | 1.37 (1.12, 1.67) | 0.67 | 1.31 (1.03, 1.66) | 0.29 |
| ≥60 | 1.25 (0.91, 1.73) |  | 1.10 (0.90, 1.34) |  |
| Family history of diabetes |  |  |  |  |
| No | 1.35 (1.08, 1.68) | 0.51 | 1.24 (1.03, 1.48) | 0.62 |
| Yes | 1.16 (0.91, 1.48) |  | 1.07 (0.77, 1.47) |  |
| Physical activity (times/week) |  |  |  |  |
| <1 | 1.27 (1.07, 1.50) |  | 1.17 (0.97, 1.42) |  |
| 1-3 | 1.47 (1.15, 1.89) | 0.40 | 1.30 (0.99, 1.71) | 0.43 |
| ≥4 | 1.11 (0.62, 2.00) |  | 0.88 (0.56, 1.36) |  |
| Alcohol consumption |  |  |  |  |
| Low (<3 drinks/month) | 1.39 (1.18, 1.64) |  | 1.17 (0.97, 1.40) |  |
| Moderate (1-6 drinks/week) | 1.36 (1.06, 1.75) | 0.22 | 1.39 (1.09, 1.76) | 0.17 |
| High (≥1 drink/day) | 0.85 (0.56, 1.29) |  | 0.75 (0.49, 1.16) |  |
| Smoking status |  |  |  |  |
| Never smoker | 1.33 (1.11, 1.59) |  | 1.14 (0.94, 1.40) |  |
| Former smoker | 1.34 (1.07, 1.68) | 0.58 | 1.29 (1.02, 1.63) | 0.70 |
| Current smoker | 1.21 (0.72, 2.05) |  | 0.91 (0.55, 1.52) |  |
| HbA1c‡§ |  |  |  |  |
| <Median | 2.15 (0.84, 5.49) | 0.21 | 2.08 (0.59, 7.36) | 0.31 |
| ≥Median | 1.43 (0.93, 2.21) |  | 1.31 (0.81, 2.10) |  |
| TNF-RII‡§ |  |  |  |  |
| <Median | 1.28 (0.93, 1.78) | 0.97 | 1.37 (0.98, 1.93) | 0.67 |
| ≥Median | 1.27 (1.06, 1.53) |  | 1.12 (0.75, 1.66) |  |

* RR per 1 log-SD increase (SD determined from control distribution); Full model adjusted for matching factors and diabetes risk factors (i.e., alcohol intake, exercise, cigarette smoking status, and family history of diabetes).

† P-value for interaction calculated by Wald test (for variables with 2 levels) or Chi-square test (for variables with 3 levels) of the pooled estimates.

‡ To control for within-category confounding by the continuous stratifying variables, we included the stratifying variable (continuous) in its respective regression model as a covariate.

§ Medians (based on control distributions in women and men, separately) were used to dichotomize values. Sex-specific associations were then pooled using a random-effects meta-analysis model.

**Supplemental Table A2**. Sensitivity analyses (pooled estimates of men and women): Relative Risk (and 95% CI) for developing type 2 diabetes by plasma levels of resistin.

| Variable | Quartile 1 | Quartile 2 | Quartile 3 | Quartile 4 | P-Trend | Continuous  (Per 1 SD increase) * |
| --- | --- | --- | --- | --- | --- | --- |
| Full Model | 1.00 | 1.08 | 1.28 | 1.94 | 0.001 | 1.31 |
|  |  | (0.59, 1.97) | (0.85, 1.92) | (1.28, 2.94) |  | (1.14, 1.50) |
| †Excluding first 3 years of follow-up | 1.00 | 0.74 | 1.26 | 1.44 | 0.02 | 1.23 |
|  |  | (0.16, 3.35) | (0.77, 2.06) | (0.59, 3.50) |  | (1.02, 1.48) |
| ‡Excluding high risk people at baseline | 1.00 | 1.35 | 1.48 | 2.22 | 0.03 | 1.36 |
|  |  | (0.52, 3.51) | (0.76, 2.87) | (1.08, 4.60) |  | (1.07, 1.73) |
| §Full model + HbA1c | 1.00 | 0.52 | 1.82 | 2.62 | 0.02 | 2.64 |
|  |  | (0.03, 8.92) | (0.97, 3.43) | (1.32, 5.21) |  | (0.56, 12.49) |
| ║Full Model + TNF-RII | 1.00 | 1.05 | 1.23 | 1.83 | 0.003 | 1.29 |
|  |  | (0.57, 1.93) | (0.81, 1.86) | (1.18, 2.83) |  | (1.12, 1.48) |
| ¶Full Model + BMI + TNF-RII | 1.00 | 1.00 | 1.36 | 1.68 | 0.04 | 1.23 |
|  |  | (0.36, 2.75) | (0.84, 2.22) | (1.01, 2.81) |  | (1.05, 1.43) |
| #Full model + Waist | 1.00 | 0.94 | 1.12 | 1.61 | 0.03 | 1.23 |
|  |  | (0.35, 2.48) | (0.72, 1.75) | (1.03, 2.50) |  | (1.07, 1.42) |
| **Full model + Waist + CRP/TNF-RII | 1.00 | 0.89 | 1.00 | 1.25 | 0.31 | 1.14 |
|  |  | (0.43, 1.85) | (0.63, 1.58) | (0.78, 2.02) |  | (0.98, 1.33) |
| ††Full model + Waist + TNF-RII | 1.00 | 0.99 | 1.25 | 1.87 | 0.01 | 1.28 |
|  |  | (0.37, 2.69) | (0.77, 2.02) | (1.16, 3.02) |  | (1.10, 1.49) |

* RR for per 1 standard deviation increase in log-transformed values of resistin.

† Full model after excluding cases that occurred within the first 3 years of follow-up.

‡ Full model after excluding “high risk” participants (HbA1c>6.5% and BMI>30) at baseline.

§ Full model additionally adjusted for HbA1c.

║ Full model additionally adjusted for TNF-RII.

¶ Full model additionally adjusted for TNF-RII and BMI.

# Full model additionally adjusted for waist circumference in WHS (and BMI in PHS II).

** Full model additionally adjusted for CRP and waist circumference in WHS, and TNF-RII and BMI in PHS II.

†† Full model additionally adjusted for TNF-RII and waist circumference in WHS, and TNF-RII and BMI in PHS II.
